# Supplementary material for: Reviews and Syntheses: Evaluating the Potential Application of Ecohydrological Models for Northern Peatland Restoration: A Scoping Review
Source: Copernicus journal article supplement (doi:10.5194/bg-2023-167), 2023-10-10
Supplement: Supplementary file 1 [file bg-2023-167-supplement.zip]

**Table S4: Site location database information tabulated prior to incorporation in plotting/QGIS mapping for the second (Aug 2023) literature search papers.**

| Author(s)                  | APPROX. LATITUDE       | APPROX. LONGITUDE          | APPROX. REGIONAL LOCATION                                           | CLIMATE REGION    | Notes                                                                                                             |
|----------------------------|------------------------|----------------------------|---------------------------------------------------------------------|-------------------|-------------------------------------------------------------------------------------------------------------------|
| Ball et al.                | 58                     | -4.8                       | N Scotland                                                          | Cfb               |                                                                                                                   |
| Boonman et al.             | 52.2                   | 4.71                       | The Netherlands                                                     | Cfb               |                                                                                                                   |
| Dabrowska-zielinska et al. | 53.62                  | 22.6                       | Poland                                                              | Cfb               |                                                                                                                   |
| Dadap et al.               | -1.33                  | 111.5                      | Indonesia and Malaysia (Insular SE Asia)                            | Af                |                                                                                                                   |
| Dimitrov et al.            | 61.44; 45.4            | -121.54, -75.5             | Scotty Creek (NW Territories); Mer Bleue, Canada                    | Dfc; Dfb          |                                                                                                                   |
| Grodzka-lukaszewska et al. | 53.62                  | 22.6                       | Poland                                                              | Cfb               |                                                                                                                   |
| He et al.                  | 47.79                  | -69.52                     | Quebec, Canada                                                      | Dfb               |                                                                                                                   |
| He et al.                  | 45.4                   | -75.5                      | Mer Bleue, Canada                                                   | Dfb               |                                                                                                                   |
| Ingle et al.               | 53.32                  | -7.55                      | Ireland                                                             | Cfb               |                                                                                                                   |
| Ishtiaq et al.             | 25.44                  | -80.78                     | Florida Everglades                                                  | Am                |                                                                                                                   |
| Jussila et al.             | 67.4                   | 26.7                       | Finland                                                             | Dfc               |                                                                                                                   |
| Koch et al.                | 56.1                   | 10.2                       | Denmark (entire country)                                            | Cfb               |                                                                                                                   |
| Kou et al.                 | 69.2                   | 27.3                       | Finland                                                             | Dfc               |                                                                                                                   |
| Kwon et al.                | 62.2; 71.28; 63; 68.62 | 28.0; -156.6; -149; 161.35 | Finland; N Alaska; S Alaska; NE Russia                              | Dfc; ET; Dfc; Dsc |                                                                                                                   |
| Lambert et al.             | 52.67                  | -72.17                     | Quebec, Canada                                                      | Dfc               |                                                                                                                   |
| Link et al.                | 36.6                   | -76.47                     | Virginia, USA                                                       | Cfa               |                                                                                                                   |
| Liu et al.                 | 31.5                   | 110                        | Hubei, China                                                        | Cwb               |                                                                                                                   |
| Mccarter et al.            | 46.5                   | -81                        | Ontario, Canada                                                     | Dfb               |                                                                                                                   |
| Pettit et al.              | 48.35                  | -84.34                     | Ontario, Canada                                                     | Dfb               |                                                                                                                   |
| Puertas orozco et al.      | -20.98                 | -68.55                     | N Chile                                                             | ET                |                                                                                                                   |
| Rissanen et al.            | 65.6                   | 27                         | Finland (whole country)                                             | Dfc               |                                                                                                                   |
| Ross et al.                | -13.85                 | -71                        | Peru                                                                | ET                |                                                                                                                   |
| Schibalski et al.          | 53                     | 8                          | NW coastal mainland Europe: NE/NW Germany, E Denmark, W Netherlands | Cfb               | Four separate regions are combined here. NL: (51.5,3.6); NW DE: (53.5,7.33); NE DE: (54.3,12.25); DK: (56.2,10.6) |
| Stenberg et al.            | 62                     | 23.5                       | Finland                                                             | Dfc               |                                                                                                                   |
| Tong et al.                | 60.26                  | 17.61                      | Sweden                                                              | Cfb               |                                                                                                                   |
| Urzainki et al.            | -2                     | 104.1                      | Sumatra, Indonesia                                                  | Af                |                                                                                                                   |
| Wang and petrone           | 51.05                  | -114.87                    | Alberta, Canada                                                     | Dfc               |                                                                                                                   |
| Yuan et al.                | -3.83                  | -73.32                     | Peru Amazon                                                         | Af                |                                                                                                                   |
| Zhao et al.                | 62; 55.9               | -150.5; -112.9             | Canada; Alaska                                                      | Dsc; Dfc          |                                                                                                                   |
