# Supplementary material for: Reviews and Syntheses: Evaluating the Potential Application of Ecohydrological Models for Northern Peatland Restoration: A Scoping Review
Source: Copernicus journal article supplement (doi:10.5194/bg-2023-167), 2023-10-10
Supplement: Supplementary file 3 [file bg-2023-167-supplement.zip]

Archive with 5 entries (5 files):
- supplementary_material/s1.pdf
- supplementary_material/s2.pdf
- supplementary_material/s3.pdf
- supplementary_material/s4.pdf
- supplementary_material/s5.pdf
