# Supplementary material for: Reviews and Syntheses: Evaluating the Potential Application of Ecohydrological Models for Northern Peatland Restoration: A Scoping Review
Source: Copernicus journal article supplement (doi:10.5194/bg-2023-167), 2023-10-10
Supplement: Supplementary file 3 [file bg-2023-167-supplement.zip › supplementary_material/s1.pdf]

## Supplementary Information

**Table S1:** Full tables describing all papers included in the scoping review (obtained Sept 2022), their DOIs, authors, date, model used, and a brief description of the study. They are split into the following categories: “pure hydrology”, GHG dynamics, peat accumulation, global models, model combinations, and coupled models.

**Table S1.1: “Pure Hydrology”**

| DOI link(s), chronological order                                                        | Year(s)            | Authors            | Model                                             | Brief description                                                                                                                                                   |
|-----------------------------------------------------------------------------------------|--------------------|--------------------|---------------------------------------------------|---------------------------------------------------------------------------------------------------------------------------------------------------------------------|
| 10.5194/hess-19-2133-2015;<br>10.1002/2017wr020516                                      | 2015 & 2017        | Archarya et al.    | SWIFT2D                                           | Ridges and sloughs modelling (aerial spatial analysis)                                                                                                              |
| 10.1016/j.jhydrol.2014.12.054;<br>10.1016/j.jhydrol.2017.02.023<br>10.1029/2019wr026203 | 2015 & 2017        | Ala-aho et al.     | HydroGeoSphere (HGS)                              | Groundwater/surface water interactions in peat soils                                                                                                                |
| 10.1002/eco.230                                                                         | 2020               | Autio et al.       | HGS                                               | GW-SW exchange in peatlands. This is the paper in which a mini-review of physically based models used in peatlands was carried out                                  |
|                                                                                         | 2012               | Baird et al.       | DigiBog                                           | An introduction to the model itself with a literature review. 2D/3D water depths, K, flow                                                                           |
| 10.1016/j.jhydrol.2011.07.005                                                           | 2011               | Ballard et al.     | MATLAB ODE15 solver                               | Combining 4 1D models to develop a quasi-3D model though not fully integrated. Drained blanket peatland.                                                            |
| 10.1002/hyp.6275                                                                        | 2007               | Belyea             | Functional model (unnamed)                        | Modelling ridge K to portray bog pools                                                                                                                              |
| 10.1016/j.jhydrol.2013.06.035                                                           | 2013               | Binet et al.       | Mathematical model (unnamed)                      | Impacts of drought and vegetation of peatland hydrology                                                                                                             |
| 10.2166/nh.2013.228                                                                     | 2014               | Bourgault et al.   | MIKE-SHE                                          | GW flow in both an aquifer and a peatland                                                                                                                           |
| 10.3390/su8121324                                                                       | 2016               | Brandyk et al.     | MODFLOW                                           | Baltic peatland restoration with goal of restoring <i>Carex</i> communities                                                                                         |
| 10.19189/map.2017.omb.301                                                               | 2017               | Brust et al.       | Visual MODFLOW                                    | Developing a water balance for <i>Sphagnum</i> farming, including bunds and irrigation ditches                                                                      |
| 10.1016/s0167-5648(04)80157-6;<br>10.1029/2005wr004495                                  | 2004 & 2006        | Camporese et al.   | Numerical model (unnamed)                         | Predicting peat volumes for swelling/shrinking.                                                                                                                     |
| 10.1088/1755-1315/149/1/012026                                                          | 2018               | Condro et al.      | PEAT-VOXEL                                        | 3D agent-based model of surface water dynamics using land-atmosphere interactions from GenRiver Oil palm plantation.                                                |
| 10.1111/j.2005.0906-7590.04265.x;<br>10.1002/ecs2.4031                                  | 2005 & 2022        | Couwenberg         | Finite-difference model (unnamed)                 | Hummock-hollow patterning and square-grid WL calculations. Later developed a spatially-explicit heuristic model after Swanson & Grigal (1988) – conducted in MATLAB |
| 10.2136/sssaj2009.0148;<br>10.1016/j.ecolmodel.2013.11.030                              | 2010 & 2014        | Dimitrov et al.    | ecosys                                            | 2014: WT depths in boreal transition zones between forest & peatland; 2010: subsurface flow at Mer Bleue bog                                                        |
| 10.5194/hess-25-291-2021                                                                | 2021               | Duranel et al.     | MIKE-SHE/MIKE-11                                  | Interactions in hydrology between French mire and underlying aquifer.                                                                                               |
| 10.1002/hyp.10408;<br>10.1002/2015wr017667;<br>10.1016/j.jhydrol.2018.10.039            | 2015, 2016, & 2018 | Gao et al.         | TOPMODEL                                          | Catchment-level runoff. Focus on flooding in later 2 papers; the earliest focuses on land-cover change impacts.                                                     |
| 10.1016/j.ecolmodel.2012.06.031                                                         | 2012               | Gong et al.        | SVAT (soil-vegetation-atmosphere-transportation). | Compartmentalizes spatially into hydrologically-similar units (HSUs) to then develop a grid.                                                                        |
| 10.1029/2020wr029209                                                                    | 2021               | Gouzardi et al.    | TOPMODEL                                          | Subsurface hydrology in eroded blanket peats – flood attenuation                                                                                                    |
| 10.2166/nh.1987.0007                                                                    | 1987               | Guertin et al.     | PHIM                                              | Predicting Minnesota streamflow on a watershed level                                                                                                                |
| 10.1002/2015wr018038;<br>10.1002/2016wr019442;<br>10.1139/cjfr-2017-0269                | 2014, 2016 (Jan)   | Haahiti et al.     | FLUSH, coupled with FEMMA in some papers          | 2016 paper is included in the Autio et al. review. channel network flow through ditches, erosion assessment                                                         |
| 10.1007/s13280-017-0984-9                                                               | 2018               | Hasselquist et al. | GIS: LiDAR and SAGA                               | DEMs combined with Catchment Area (CA) algorithms within SAGA to predict flow from ditches                                                                          |
| 10.1371/journal.pone.0064174                                                            | 2013               | Heffernan et al.   | Closed-form mathematical model (unnamed)          | Ridge and slough modelling in the Everglades                                                                                                                        |
| 10.1016/j.jhydrol.2021.126894                                                           | 2021               | Hokanson et al.    | HYDRUS-2D                                         | GW recharge on a hummock scale for a water-limited area. Forested peat.                                                                                             |
| 10.1002/hyp.11449                                                                       | 2018               | Hwang et al.       | HGS                                               | Surface-subsurface flow model for a full river basin in Canada                                                                                                      |
| 10.3390/rs14133169                                                                      | 2022               | Ikkala et al.      | GIS: LiDAR and SAGA                               | Evaluating “wetness” and diversions in flow paths post-restoration for minerotrophic peatlands.                                                                     |
| 10.1007/s11027-010-9214-5                                                               | 2010               | Jaenicke et al.    | SIMGRO and GIS                                    | Spatial analysis of groundwater rise pos-restoration in a tropical peatland                                                                                         |
| 10.1016/j.jhydrol.2019.04.094                                                           | 2019               | Jaros et al.       | HGS 3D                                            | Cited in Autio et al.’s review as well as being obtained from this review’s paper search. Combining forested and open peatland model parametrization.               |
| 10.4296/cwrj3404349                                                                     | 2009               | Jutras et al.      | HYDROTEL                                          | Watershed-level streamflow and discharge water budget in Canadian peatland                                                                                          |
| 10.1029/2012gl052754                                                                    | 2012               | Kaplan et al.      | SWIFT2D                                           | Patterning model for the Everglades                                                                                                                                 |
| 10.1029/2004wr003099                                                                    | 2004               | Kennedy and Price  | FLOCOPS                                           | 1D model of hydrology and peat hydraulics in a cutover peat system. FLOCOPS developed specifically for that peatland type                                           |
| 10.5194/hess-12-1211-2008                                                               | 2008               | Koivusalo et al.   | FEMMA                                             | Peatland forestry model evaluating impacts of ditch drainage                                                                                                        |
| 10.1002/hyp.9978                                                                        | 2014               | Levison et al.     | MODFLOW                                           | Changes in flow patterns through different climate change scenarios                                                                                                 |

|                                                                                                                                    |                                          |                        |                                                                     |                                                                                                                                                                                           |
|------------------------------------------------------------------------------------------------------------------------------------|------------------------------------------|------------------------|---------------------------------------------------------------------|-------------------------------------------------------------------------------------------------------------------------------------------------------------------------------------------|
| 10.1002/hyp.9486                                                                                                                   | 2013                                     | Lewis et al.           | GEOTop (TOPMODEL-based)                                             | Forestry impact on hydrology of Irish peatlands                                                                                                                                           |
| 10.1016/j.jhydrol.2019.05.032                                                                                                      | 2019                                     | Li et al.              | MODFLOW                                                             | Disturbed peatland hydrology: cutover areas and stream gullies                                                                                                                            |
| 10.1016/j.jhydrol.2016.08.037                                                                                                      | 2016                                     | Luscombe et al.        | GIS: LiDAR (and likely other packages)                              | Flow delineation using an algorithm developed by Jensen and Dominique in 1988. Multiple spatial scales.                                                                                   |
| 10.2166/nh.2021.064                                                                                                                | 2021                                     | Marttila et al.        | MODFLOW                                                             | Groundwater flows from a mire into an esker.                                                                                                                                              |
| 10.5194/esurf-1-29-2013                                                                                                            | 2013                                     | Morris et al.          | DigiBog                                                             | Evaluating patterning in a gridded peatland landscape; are models reaching a “true” steady-state?                                                                                         |
| 10.1111/sum.12272                                                                                                                  | 2016                                     | Mustamo et al.         | DRAINMOD                                                            | Peat hydraulics and WT simulated for peat soil in different land use conditions                                                                                                           |
| 10.1007/s13280-017-0966-y                                                                                                          | 2018                                     | Nieminen et al.        | FEMMA                                                               | Runoff in boreal peat forests                                                                                                                                                             |
| 10.1016/j.scitotenv.2016.12.104                                                                                                    | 2017                                     | Nijp et al.            | Euler-forward model (unnamed), coded in the Ventana interface       | Peat volume change in drought events                                                                                                                                                      |
| 10.3846/1648-6897.2008.16.105-112                                                                                                  | 2008                                     | Povilaitis and Querner | SIMGRO                                                              | Determining water levels and overall outflow post-restoration in a lake/peatland ecosystem                                                                                                |
| 10.1080/17480930902955724                                                                                                          | 2010                                     | Price et al.           | Numerical model (unnamed in abstract and no access to full article) | Fen reconstruction design and hydrological modelling after oil sands mining took place (Alberta). Perhaps not relevant but I’m keeping until I can check the full article                 |
| 10.1016/j.jhydrol.2018.05.041                                                                                                      | 2018                                     | Pullens et al.         | GEOTop                                                              | Mountain peatland surrounded by other ecosystems: simulating discharge, volumetric water content, and energy fluxes                                                                       |
| 10.1002/hyp.14470                                                                                                                  | 2022                                     | Putra et al.           | DigiBog_Hydro                                                       | 2D (x-y) hydrology evaluating restoration in a tropical peatland.                                                                                                                         |
| 10.1623/hysj.54.2.363; No DOI (ISSN: 1230-1485; vol 19 issue 1 pp. 149-159)                                                        | 2009 & 2010                              | Querner et al.         | SIMGRO within GIS environment                                       | Northern European peatland hydrology and more Lithuania basin hydrology (see Povilaitis & Querner)                                                                                        |
| 10.1080/02626667.2017.1391387                                                                                                      | 2017                                     | Quillet et al.         | MODFLOW                                                             | 2D steady-state groundwater flow in Canadian peatlands of varying hydrogeological settings                                                                                                |
| 10.1016/s0022-1694(99)00183-3; 10.1016/s0022-1694(00)00386-3; 10.1016/s0022-1694(00)00402-9; 10.1672/07-71.1; 10.1029/2008gm000825 | 2000, 2001 (Feb), 2001 (Mar), 2008, 2009 | Reeve et al.           | MODFLOW, MODPATH                                                    | Vertical flow in peatlands; dispersive mixing; regional groundwater flow; simulating hydrogeologic setting in Alaska; permeable mineral lenses in peat hydrology                          |
| 10.1623/hysj.53.5.989                                                                                                              | 2008                                     | Schmalz et al.         | SWAT                                                                | Discharge for lowland catchments larger than but often including peatlands. May be too broad a scope.                                                                                     |
| 10.3390/f9100645                                                                                                                   | 2018                                     | Stenberg et al.        | FLUSH                                                               | Drained, forested peatland hydrology: role of tree stand management                                                                                                                       |
| 10.1016/j.jhydrol.2018.03.011                                                                                                      | 2018                                     | Sterte et al.          | MIKE-SHE                                                            | Groundwater-surface water interactions in a boreal peatland                                                                                                                               |
| 10.5614/j.eng.technol.sci.2021.53.2.5                                                                                              | 2021                                     | Suryadi et al.         | GIS Freewat plugin which integrates MODFLOW                         | “Canal blocking” model in tropical peatlands. Divisions into sub-peatland hydrological units occur here.                                                                                  |
| 10.1016/j.scitotenv.2022.157543                                                                                                    | 2022                                     | Sutton and Price       | MODFLOW-SURFACT                                                     | Solute transport and WT simulations. Sodium transport implications for fen development.                                                                                                   |
| 10.1016/j.geoderma.2019.04.001; 10.1088/1748-9326/ab96d4                                                                           | 2019 & 2020                              | Taufik et al.          | SWAP                                                                | Predicting drought severity in tropical peatlands (may not be as applicable)                                                                                                              |
| 10.1016/j.jhydrol.2015.05.027; 10.1002/hyp.11183                                                                                   | 2015 & 2017                              | Thompson et al.        | HGS                                                                 | One of these papers is also included in the Autio et al. review. Yielding primarily hydraulic heads to investigate more GW-SW interactions and climate change impacts on Boreal peatlands |
| 10.1016/j.jhydrol.2005.10.039                                                                                                      | 2006                                     | Tiemeyer et al.        | Numerical model (unnamed)                                           | Based on boussinesq equation, development of a model from a limited dataset (requires only Ks, Sy, and weights)                                                                           |
| 10.1002/eco.2445                                                                                                                   | 2022                                     | Tilak et al.           | HYDRUS-1D                                                           | Surface controls in peat hydrology and resilience to disturbances                                                                                                                         |
| 10.5194/bg-17-4769-2020                                                                                                            | 2020                                     | Urzainki et al.        | Numerical model (unnamed)                                           | Again, boussinesq-based. Full explanations of the model are available in 2 cited papers. Canal blocking optimization.                                                                     |
| 10.1016/j.ecolmodel.2005.07.016                                                                                                    | 2006                                     | Weiss et al.           | 1D numerical model (unnamed)                                        | WT levels with time along with peat temperatures in boreal peatlands                                                                                                                      |
| 10.1016/j.envsoft.2016.06.004                                                                                                      | 2016                                     | Zi et al.              | GEOTop                                                              | 3D hydrology and transport for soil erosion dynamics.                                                                                                                                     |

**Table S1.2: GHG Dynamics**

| DOI link(s), chronological order             | Year(s)      | Authors                        | Model                                   | Brief description                                                                                                                                                                     |
|----------------------------------------------|--------------|--------------------------------|-----------------------------------------|---------------------------------------------------------------------------------------------------------------------------------------------------------------------------------------|
| 10.3390/rs10040565                           | 2018         | Arroyo-Mora et al.             | GIS – LiDAR and empirical models        | Estimating photosynthetic activity and carbon uptake spatially                                                                                                                        |
| 10.5194/cp-5-361-2009                        | 2009         | Berrittella and van Huissteden | PEATLANDVU and BIOME                    | Calculating process-based plot-scale vegetation NPP (BIOME) and CH4 emissions (PEATLANDVU)                                                                                            |
| 10.3390/rs10040565                           | 2018         | Bona et al.                    | The Canadian model for peatlands (CaMP) | Canada-specific model for carbon budgeting: yields CO2, CH4, and WT estimates for entire peatlands (“large spatial scale”). Sort of a step up from just finding NEE/CH4 site by site. |
| 10.1007/s10584-012-0445-1                    | 2020         | Bosio et al.                   | GIS and HadCM3                          | Vegetation change and CO2/CH4 emission based on “vegetation type specific flux estimates” with respect to climate change                                                              |
| 10.1007/s10021-019-00430-5                   | 2020         | Chamberlain et al.             | R-coded machine learning                | Methane-specific connections between GHGs and salinity in drought conditions                                                                                                          |
| 10.5194/tc-13-647-2019; 10.1029/2019jg005355 | 2019 (Feb) & | Chang et al.                   | Ecosys                                  | Carbon cycle sensitivities to permafrost thaw; methane production with permafrost thaw                                                                                                |

|                                                                          |                |                                   |                                                            |                                                                                                                                                                                                                                                                                                                                                                                                                                                                                                   |
|--------------------------------------------------------------------------|----------------|-----------------------------------|------------------------------------------------------------|---------------------------------------------------------------------------------------------------------------------------------------------------------------------------------------------------------------------------------------------------------------------------------------------------------------------------------------------------------------------------------------------------------------------------------------------------------------------------------------------------|
|                                                                          | 2019<br>(Oct)  |                                   |                                                            |                                                                                                                                                                                                                                                                                                                                                                                                                                                                                                   |
| 10.1594/pangaea.875116                                                   | 2017           | Chaudhary et al.                  | LPJ-GUESS                                                  | Process-based combination of vegetation dynamics and GHGs used here for an arctic Holocene model                                                                                                                                                                                                                                                                                                                                                                                                  |
| 10.5194/bg-11-4753-2014;<br>10.1002/2014jg002880                         | 2014 &<br>2015 | Deng et al.                       | DeNitrification<br>DeComposition<br>(DNDC)                 | Combining a soil temperature model with DNDC to model permafrost thaw and GHG fluxes; effects of changing temperatures and WT on C-fluxes.                                                                                                                                                                                                                                                                                                                                                        |
| 10.1029/2008wr007284                                                     | 2008           | Dinsmore &<br>Billett             | Empirical model<br>(unnamed)                               | CO2 in a peatland stream (may be DOC actually?)                                                                                                                                                                                                                                                                                                                                                                                                                                                   |
| 10.1002/eco.1592                                                         | 2015           | Evrendilek                        | Neural network                                             | Extrapolating NEE spatially to assess sink/source strength in response to hydrology/extreme events                                                                                                                                                                                                                                                                                                                                                                                                |
| 10.1016/j.cosust.2011.08.010;<br>10.1007/s11027-013-9517-4               | 2011 &<br>2014 | Farmer et al.                     | Model review;<br>TROPP-CAT                                 | From the first review of peatland GHG emissions models, the following models in a TROPICAL context were mentioned: HPM, McGill Wetland Model, Yasso, MERES, LPJ, RothC, SUNDIAL, and ECOSSE, as well as PEATLAND, PnET, and SIMGRO. The second paper developed a new peatland-plantation carbon tool specific for tropical plantations on peatlands, but maybe could be adjusted for a northern forestry context. Effects of microtopography, temp, & precip on CO2/CH4 exchange in arctic tundra |
| 10.1002/2017jg004037                                                     | 2017           | Grant et al.                      | Ecosys                                                     | Impacts of seawater inundation of carbon cycle. Hand-calculated model of carbon emissions based on 4 inundation scenarios                                                                                                                                                                                                                                                                                                                                                                         |
| 10.1029/2006jg000395                                                     | 2008           | Henman and<br>Poulter             | Numerical model<br>(unnamed)                               | Hand-developed CH4 emission model for Mer Bleue. 1D.                                                                                                                                                                                                                                                                                                                                                                                                                                              |
| 10.1007/s00254-008-1613-5                                                | 2009           | Lai                               | Numerical model<br>(unnamed)                               |                                                                                                                                                                                                                                                                                                                                                                                                                                                                                                   |
| 10.5281/zenodo.6802101                                                   | 2022           | Lippmann                          | PVN                                                        | Source code and documents about the PVN model for peatland GHG emissions including plant functional types. Does not link paper which use the model.                                                                                                                                                                                                                                                                                                                                               |
| 10.1016/j.ecolind.2017.08.014                                            | 2017           | Parkkari et al.                   | Maxent (machine<br>learning)                               | Spatial variation of GHG fluxes on a landscape distribution level                                                                                                                                                                                                                                                                                                                                                                                                                                 |
| 10.5194/bg-5-111-2008;<br>10.1017/s0016774600000913<br>10.1029/97gb02302 | 2008 &<br>2009 | Petrescu et al.                   | PEATLAND-VU                                                | Hydrological parametrization of methane emissions modelling in the arctic; a modelling approach in the Netherlands                                                                                                                                                                                                                                                                                                                                                                                |
|                                                                          | 1997           | Potter                            | Mathematical model                                         | Carnegie-Ames-Stanford Approach (CASA) for simulating methane production and emission from wetlands                                                                                                                                                                                                                                                                                                                                                                                               |
| 10.1016/j.scitotenv.2020.142433                                          | 2021           | Premrov et al.                    | ECOSSE                                                     | CO2 fluxes from a drained and rewetted peatland based on water table simulation.                                                                                                                                                                                                                                                                                                                                                                                                                  |
| --                                                                       | 2015           | Roulet & Wang                     | McGill Wetland<br>Model                                    | NEE, CH4, and DOC exchanges modelled for a thawing palsa peatland                                                                                                                                                                                                                                                                                                                                                                                                                                 |
| 10.1016/j.foreco.2021.119479<br>10.1029/2007jg000605                     | 2021<br>2008   | Shanin et al.<br>Sonnentag et al. | ROMUL_Hum<br>BEPS-TerrainLab                               | Humic decomposition to describe C-fluxes in forested peatlands. Vegetation-based C-fluxes under peatland hydrology; tweaked to predict WT as well.                                                                                                                                                                                                                                                                                                                                                |
| 10.7809/b-e.00127                                                        | 2012           | Thiele et al.                     | GEST-Model                                                 | Access to abstract only. Belarus-specific assessment tool of peatland restoration and GHG emissions                                                                                                                                                                                                                                                                                                                                                                                               |
| 10.1029/96gl03577                                                        | 1996           | Walter et al.                     | Process-based model<br>(unnamed in abstract;<br>no access) | Methane emissions in natural wetlands as a function of hydrologic/thermal conditions                                                                                                                                                                                                                                                                                                                                                                                                              |
| 10.5194/gmd-3-565-2010<br>10.1016/j.scitotenv.2012.08.084                | 2010<br>2012   | Wania et al.<br>Worrall & Clay    | LPJ-WHyMe<br>Durham Carbon<br>Model                        | Extension of globally flexible models for wetland methane emissions. Impacts of sheep grazing on carbon balance; simulates GHG fluxes and defines a GHG "carry capacity" for sheep populations in developing emissions factors                                                                                                                                                                                                                                                                    |
| 10.1002/jgrg.20045                                                       | 2013           | Wu et al.                         | McGill Wetland<br>Model                                    | Likely a precursor to CLASS3W-MWM; simulating 6 years of C-fluxes in an oligotrophic minerogenic peatland                                                                                                                                                                                                                                                                                                                                                                                         |

**Table S1.3: Peat Accumulation**

| DOI link(s), chronological order                                            | Year(s) | Authors              | Model                                              | Brief description                                                                                                                                                                                     |
|-----------------------------------------------------------------------------|---------|----------------------|----------------------------------------------------|-------------------------------------------------------------------------------------------------------------------------------------------------------------------------------------------------------|
| 10.1111/j.0022-0477.2004.00905.x                                            | 2004    | Bauer                | Numerical model (unnamed)                          | Dry peat mass storage model leading to accumulation; simulating the long-term impacts of litter quality                                                                                               |
| 10.1111/j.1529-8817.2003.00783.x                                            | 2004    | Belyea &<br>Malmer   | Mathematical model (unnamed)                       | Simulating historical carbon sequestration responses to climate over millenia                                                                                                                         |
| 10.1672/0277-<br>5212(2002)022(0100:mcairm)2.0.co;2<br>10.5194/esd-1-1-2010 | 2002    | Chimner et<br>al.    | CENTURY                                            | Long-term C-accumulation and short-term changes in C-accumulation due to changes in hydrology.                                                                                                        |
|                                                                             | 2010    | Frolking et<br>al.   | Holocene Peat Model (HPM)                          | Description of the model in a paper – yield NPP, decomposition, water balance, and peat accumulation.                                                                                                 |
| 10.1890/06-1267.1                                                           | 2007    | Larsen et al.        | PeatAccrete                                        | Ridge and slough ecohydrological feedbacks impacting long-term landscape morphology (century scale)                                                                                                   |
| 10.1029/2012jg002092                                                        | 2013    | Quillet et al.       | HPM                                                | Sensitivity analysis for HPM determining main drivers for peat accumulation                                                                                                                           |
| 10.1029/2009wr008242                                                        | 2010    | Rennermalm<br>et al. | PAM_T/SPAM_T                                       | Stochastic peat accumulation model based on the hydrological cycle, determining the long-term influence of hydrological variability                                                                   |
| 10.1029/2012gl051500                                                        | 2012    | Swindles et<br>al.   | DigiBog                                            | Reconstruction of past bog growth, WT, and links (or lack thereof) with climate                                                                                                                       |
| 10.1002/2016jg003452                                                        | 2016    | Wang et al.          | Peat Terrestrial Ecosystem Model<br>(P-TEM)        | Containing modules for hydrology, soil thermal and methane, though this paper focuses on carbon accumulation (Technically, this is a "coupled" model but the focus is what puts it in this category). |
| 10.1007/s12665-011-1073-1                                                   | 2012    | Wu                   | Peat Accumulation Model (PAM)<br>within STELLA 9.0 | Dynamic system modelling approach. Linking peat development responses to (imposed) climate changes.                                                                                                   |

**Table S1.4: Global Models**

| DOI link(s), chronological order                                                                       | Year(s)                  | Authors            | Model                                                   | Brief description                                                                                                                                                                                     |
|--------------------------------------------------------------------------------------------------------|--------------------------|--------------------|---------------------------------------------------------|-------------------------------------------------------------------------------------------------------------------------------------------------------------------------------------------------------|
| 10.5194/hess-18-3319-2014;<br>10.1029/2018ms001574;<br>10.1016/j.rse.2020.111805<br>10.3390/rs12182936 | 2014,<br>2019, &<br>2020 | Bechtold et al.    | Peatland Catchment<br>Land Surface Model<br>(PEAT-CLSM) | A peatland-specific attachment to the NASA-developed CLSM. More for incorporation into larger climate models. 2014 paper does not use CLSM, but is likely a precursor to its development              |
|                                                                                                        | 2020                     | Burdun et al.      | Optical TRapezoid<br>Method (OPTRAM) and<br>PEAT-CLSM   | Physically based approach to estimate soil moisture remotely (OPTRAM) combined with PEAT-CLSM to develop a moisture index in peatlands                                                                |
| 10.5281/zenodo.3829896                                                                                 | 2020                     | Dietrich et al.    | MAGPIE                                                  | Source code and documentation for the model: a global multi-regional energy/economy/land/climate dynamics model, which links a citation using the model on a peatland (Humpenoeder et al. down below) |
| 10.1016/j.ecolmodel.2013.04.018                                                                        | 2013                     | Gong et al.        | Process-based model<br>(unnamed)                        | National model for CO <sub>2</sub> and CH <sub>4</sub> fluxes in pristine peatlands.                                                                                                                  |
| 10.1029/2021ms002721                                                                                   | 2022                     | Graham et al.      | ELM-SPRUCE                                              | Land surface model simulating nitrogen, carbon, and water cycling specific to the SPRUCE experiment site in Minnesota. Parametrization and sensitivities analyzed here.                               |
| 10.1002/hyp.1265                                                                                       | 2003                     | Hall et al.        | MOSES                                                   | Hydraulic/thermal surface exchange in peat layers to contribute to GCMs                                                                                                                               |
| 10.1088/1748-9326/abae2a                                                                               | 2020                     | Humpenoeder et al. | MAGPIE                                                  | Land-use change projections affecting peatland area and GHG emissions                                                                                                                                 |
| 10.5194/gmd-11-3279-2018                                                                               | 2018                     | Largerone et al.   | ORCHIDEE ORC-HL-<br>PEAT                                | TOPMODEL approach for high-latitude peatland mapping                                                                                                                                                  |
| 10.1007/s00267-014-0417-5                                                                              | 2015                     | Nungesser et al.   | SFWM                                                    | Legacy model specific to south Florida; long-term predictions of climate change scenarios for the Everglades                                                                                          |
| 10.1029/2009gb003610                                                                                   | 2010                     | Petrescu et al.    | PEATLAND-VU and<br>PCR-GLOBWB                           | Up-scaling PEATLAND-VU for global models. PCR-GLOBWB was used to provide daily hydrological output in the form of WT depths and snow thickness                                                        |
| 10.5194/gmd-11-497-2018;<br>10.5194/gmd-12-2961-2019                                                   | 2018 &<br>2019           | Qiu et al.         | ORCHIDEE-PEAT/<br>ORCHIDEE-MICT                         | CO <sub>2</sub> and hydrology for land surface derived from a global peat map. Description of model in 2018 paper and application to post-Holocene peatland C-dynamics in 2019.                       |
| 10.5194/cp-9-1287-2013                                                                                 | 2013                     | Spahni et al.      | LPX-Bern 1.0                                            | Integrated natural, agricultural, and peatland ecosystems N & C dynamics: vegetation-based model. Incorporates some hydrology (likely just WT). Related to LPJ as seen earlier.                       |

**Table S1.5: Model Combinations**

| DOI link(s), chronological order                   | Year(s)        | Authors               | Model                                                                                                                                                | Brief description                                                                                                                                                                                                           |
|----------------------------------------------------|----------------|-----------------------|------------------------------------------------------------------------------------------------------------------------------------------------------|-----------------------------------------------------------------------------------------------------------------------------------------------------------------------------------------------------------------------------|
| 10.5194/bg-12-5689-2015;<br>10.5194/gmd-9-915-2016 | 2015 &<br>2016 | Aleina et al.         | Hummock-hollow (HH)<br>model                                                                                                                         | Combined with an unnamed process-based model from Walter and Heimann (2000). Modelling the effects of microtopography on CH <sub>4</sub> fluxes and upscaling CH <sub>4</sub> emission hotspots to global levels.           |
| 10.5194/hess-22-4907-2018                          | 2018           | Bernard-Jannin et al. | Hydrological model with<br>DOC-transport (unnamed)                                                                                                   | DOC dynamics in a rehabilitated <i>Sphagnum</i> peatland, for when a single outlet is not easily identifiable or monitored. Note neither model is housed in an interface.                                                   |
| 10.1088/1748-9326/2/4/045015                       | 2007           | Bohn et al.           | Variable infiltration capacity<br>(VIC) macrohydro model,<br>with the biosphere-energy-<br>transfer-hydrology terrestrial<br>ecosystem model (BETHY) | Grid-cell format model simulating yearlong estimates for CH <sub>4</sub> emissions, soil temperature, and water table.                                                                                                      |
| 10.1002/eco.2471                                   | 2022           | Booth et al.          | HyperNiche 2 with unnamed<br>numerical variable-saturated<br>GW-flow model                                                                           | Combination of simulating hydrologically-based habitat niches with regional hydrology in fens (2D) for better estimates of soil moisture based on vegetation growth. Also outputs a weighted Floristic Quality Index (wFQI) |
| 10.1007/s10533-016-0182-z                          | 2016           | de Wit et al.         | PERSiSt and INCA-C                                                                                                                                   | Hydrological outputs from the rainfall-runoff model PERSiSt informed DOC transport simulated by INCA-C. Identifying controls (seasalt depositions, temperature, precipitation)                                              |
| 10.1086/598487                                     | 2009           | Eppinga et al.        | Unnamed model                                                                                                                                        | No full access to article. Combination of nutrient model and hydrology model for peatland surface patterning.                                                                                                               |
| 10.1002/2016wr019442;<br>10.1139/cjfr-2017-0269    | 2016 &<br>2018 | Hahti et al.          | FLUSH with a 1D sediment<br>transport model (unnamed)                                                                                                | Sediment transport and evaluation of control in a drainage network within a forested peatland.                                                                                                                              |
| 10.1111/j.1600-<br>0889.2005.00168.x               | 2006           | Ju et al.             | InTEC 3.0 with TOPMODEL                                                                                                                              | Providing a hydrological input to a GHG model InTEC on a large scale. Simulating multi-year WT depths, NEP/NBP, and soil C density.                                                                                         |
| 10.1002/2015wr018057                               | 2016           | Kurylyk et al.        | NEST with SUTRA                                                                                                                                      | A 1D wetland and peatland hydrology model NEST link with a spatial subsurface heat transfer model SUTRA to simulate vertical/lateral heat flow during permafrost thaw/peatland landscape transition                         |
| 10.1111/gcb.16359                                  | 2022           | Wilson et al.         | NEE and CH <sub>4</sub> flux<br>calculations combined with<br>ArcGIS spatial hydrology.                                                              | Producing WT simulations along with C-exchange for climate scenarios in a re-wetted peatland. Will likely read this more fully as a part of what's going on in Ireland.                                                     |
| 10.1029/2019wr025592                               | 2020           | Xu et al.             | PERSiSt and INCA-C                                                                                                                                   | Another paper combining a hydrological and chemical model to look at DOC transport. One related author (Ledesma) worked on both papers. More of a water-supply focus from peatland-fed systems under climate change.        |

**Table S1.6: Coupled Models**

| DOI link(s), chronological order                                                                                                                                   | Year(s)                       | Authors                                     | Model                                                              | Brief description                                                                                                                                                                                                                                                                                     |
|--------------------------------------------------------------------------------------------------------------------------------------------------------------------|-------------------------------|---------------------------------------------|--------------------------------------------------------------------|-------------------------------------------------------------------------------------------------------------------------------------------------------------------------------------------------------------------------------------------------------------------------------------------------------|
| <i>Book chapter. ISBN: 978-1-4398-1425-3</i>                                                                                                                       | 2011                          | Brooks et al.                               | PHIM WET-HAWQ                                                      | Intact and drained peat for full systems with a hydrograph input; incorporating codes for water quality and biogeochemistry                                                                                                                                                                           |
| <i>10.1029/2010jg001312;</i><br><i>10.1029/2010jg001586</i>                                                                                                        | 2010 & 2011                   | Dimitrov et al.                             | <i>ecosys</i>                                                      | Combination of hydrology and GHG emissions. Impact of hydrology on ecosystem respiration in 2010; impacts on NPP and NEP in 2011.                                                                                                                                                                     |
| <i>10.1016/j.agrformet.2013.06.012;</i><br><i>10.1016/j.agrformet.2014.08.011;</i><br><i>10.5194/bg-17-5693-2020</i>                                               | 2013, 2014, & 2020            | Gong et al.                                 | RCG-C (2013 & 2014) and Peatland Moss Simulator (2020)             | Development of a <i>crop-cultivated</i> peatland model for C-fluxes and water balances. 2020 paper outlines <i>sphagnum</i> vegetation dynamics relative to water and energy balances                                                                                                                 |
| <i>10.5194/bg-13-2305-2016</i>                                                                                                                                     | 2016                          | He et al.                                   | CoupModel                                                          | Drained peatlands for forestry, modelling plant and soil development from 1951 to 2011, as well as GW level, NEE, and accumulated CO <sub>2</sub> and N <sub>2</sub> O fluxes.                                                                                                                        |
| <i>10.3354/cr00928;</i><br><i>10.1111/gcb.14298</i>                                                                                                                | 2010 & 2018                   | Heinemeyer et al.                           | MILLENNIA                                                          | Development of peat-accumulation cohort model MILLENNIA which also includes variable WTD to drive C-dynamics, then using MILLENNIA on available climate records for reconstructions while incorporating impacts of land management on climate change.                                                 |
| <i>10.1046/j.1365-2745.2000.00438.x</i>                                                                                                                            | 2000                          | Hilbert et al.                              | Mathematical mixed model (unnamed)                                 | Two coupled non-linear differential equation representing change in peat depth and depth to the water table. Technically this is probably considered as just one hydrological model but because they hand-combine the two equations rather than automating it I'm putting it here.                    |
| <i>10.5772/1743</i>                                                                                                                                                | 2010                          | Ise et al.                                  | ED2.0-peat                                                         | Predicting water table, soil temperature, and methane emissions as well as being able to simulate peat accumulation over millennia in different climate scenarios. Results did not seem very precise, though...                                                                                       |
| <i>10.1111/gcb.13931</i>                                                                                                                                           | 2018                          | Kasimir et al.                              | CoupModel                                                          | GHG fluxes informed by hydrology and plant production as well as crop economics                                                                                                                                                                                                                       |
| <i>10.3390/f12030293</i>                                                                                                                                           | 2021                          | Lauren et al.                               | SUSI                                                               | Stand growth, nutrient availability, and hydrology for drained <i>forested</i> peatlands under varied management conditions and site types                                                                                                                                                            |
| <i>10.1002/eco.2361</i>                                                                                                                                            | 2022                          | Mahdiyasa et al.                            | MPeat                                                              | 1D peat growth model producing cumulative C and WT depths over long time scales. Compared against DigiBog and HPM.                                                                                                                                                                                    |
| <i>10.3390/w14091458</i>                                                                                                                                           | 2022                          | Melaku et al.                               | SWAT                                                               | Coupling watershed-level hydrology with CO <sub>2</sub> emissions and NEE. Semi-distributed with subroutings predicting emissions at a hydrologic response unit (HRU) level.                                                                                                                          |
| <i>10.5194/gmd-9-4313-2016</i>                                                                                                                                     | 2016                          | Metzger et al.                              | CoupModel                                                          | Parameter interactions and sensitivity analysis for the model in a natural peatland. Modelling C, heat, and water fluxes.                                                                                                                                                                             |
| <i>10.5194/bg-11-577-2014;</i><br><i>10.1002/2015jg003005;</i><br><i>10.1002/2016jg003501;</i><br><i>10.5194/bg-14-5507-2017</i><br><i>10.5194/bg-11-3985-2014</i> | 2014, 2015, 2016, & 2017      | Mezbahuddin et al.                          | <i>ecosys</i>                                                      | 2014: effects of seasonal variation in WT on net CO <sub>2</sub> exchange by simulating both WTD and NEP; comparing modelling versus measurements for seasonal variation; 2016: hydrological controls for a northern site; 2017: simulating WTD effects on CO <sub>2</sub> exchange in northern site. |
| <i>10.1002/eco.229;</i><br><i>10.1002/2015wr017264;</i><br><i>10.1002/2015g1066824</i>                                                                             | 2014                          | Mi et al.                                   | PEATLAND-VU                                                        | Capturing CH <sub>4</sub> fluxes, WT position, and soil thermal properties for a 1D column (plot-scale).                                                                                                                                                                                              |
| <i>10.1002/eco.229;</i><br><i>10.1002/2015wr017264;</i><br><i>10.1002/2015g1066824</i>                                                                             | 2012, 2015 (Jul) & 2015 (Dec) | Morris et al.                               | DigiBog                                                            | Combination of hydrology and C-accumulation. Development of the model in 2012, fine-tuning peat K in models vs. measurements in Jul 2015; simulating WTDs and peat decomposition for long-term post-Holocene peat development.                                                                        |
| <i>10.1016/j.ecohyd.2013.03.004;</i><br><i>10.1016/j.ecolmodel.2017.04.014</i>                                                                                     | 2013 & 2017                   | Nakayama                                    | National Integrated Catchment-based Eco-hydrology (NICE), NICE-BCG | 2013: distributed model which combines hydrology and ecology. Only outputs sediment nutrient loading rather than gaseous fluxes. 2017: Now coupled to include CO <sub>2</sub> and CH <sub>4</sub> fluxes in NICE-BCG.                                                                                 |
| <i>10.1016/s0304-3800(03)00067-x</i>                                                                                                                               | 2003                          | Nungesser                                   | HOHUM (HOlow HUMmock) – different from HH?                         | Combining hydrology with <i>sphagnum</i> growth and decomposition and peat accumulation. Used for microtopography modelling in hummocks and hollows                                                                                                                                                   |
| <i>10.5194/bg-12-6463-2015</i>                                                                                                                                     | 2015                          | Shi et al.                                  | Community Land Model                                               | Combining hydrology (chiefly WT) with vegetation dynamics. TOPMODEL-based subsurface flow approach. No GHGs.                                                                                                                                                                                          |
| <i>10.1029/2011jg001862</i>                                                                                                                                        | 2012                          | Sulman et al.                               | DLEM, LPJ, <i>ecosys</i> , ORCHIDEE, SiB SIBCASA, and TECO         | Comparison of seven CO <sub>2</sub> flux models. Only <i>ecosys</i> simulates WTDs, many of the other may fall better into the GHG-only category.                                                                                                                                                     |
| <i>10.1002/eco.1526;</i><br><i>10.1016/j.scitotenv.2017.11.252</i>                                                                                                 | 2015 & 2018                   | Tang et al.                                 | LPJ-GUESS                                                          | Full catchment scale coupling hydrology and carbon cycling for DOC/SOC sorption and transport.                                                                                                                                                                                                        |
| <i>10.1078/1617-1381-00016;</i><br><i>10.1002/hyp.1380</i>                                                                                                         | 2002 & 2004                   | Trepel and Kluge                            | DILAMO (2002) and WETTRANS (2004)                                  | DILAMO combines water/nitrogen/carbon cycles, and able to be incorporated into GIS with DEMs. WETTRANS couples hydrology with N-exchange in riparian peatlands.                                                                                                                                       |
| <i>10.1016/j.ecolmodel.2012.10.004</i><br><i>10.1080/07055900.2012.730980;</i><br><i>10.1002/2014gb004845</i><br><i>10.1002/2016wr019898</i>                       | 2013<br>2012 & 2014<br>2017   | Webster et al.<br>Wu et al.<br>Young et al. | Wetland-DNDC<br>CLASS3W-MWM (from McGill WM)<br>DigiBog            | Fen carbon dynamics over multiple decades coupled with hydrology. coupled land-surface scheme and peatland C model. Responses of bogs and fens                                                                                                                                                        |
| <i>10.1016/j.jhydrol.2021.127137</i>                                                                                                                               | 2021                          | Yuan et al.                                 | ELM-SPRUCE E3SM                                                    | 2D application of DigiBog investigating the effects of ditch damming on peat depths and water table, in short- and long-term scales.                                                                                                                                                                  |
| <i>10.1029/2001gb001838</i>                                                                                                                                        | 2002                          | Zhang et al.                                | Wetland-DNDC                                                       | Hydrological impacts on peatland CH <sub>4</sub> emission under climate scenarios                                                                                                                                                                                                                     |
|                                                                                                                                                                    |                               |                                             |                                                                    | Fully explained model and tested in multiple locations.                                                                                                                                                                                                                                               |
