# Supplementary material for: Reviews and Syntheses: Evaluating the Potential Application of Ecohydrological Models for Northern Peatland Restoration: A Scoping Review
Source: Copernicus journal article supplement (doi:10.5194/bg-2023-167), 2023-10-10
Supplement: Supplementary file 3 [file bg-2023-167-supplement.zip › supplementary_material/s2.pdf]

**Table S2.** Site location database information tabulated prior to incorporation in plotting/QGIS mapping for September 2022 literature search papers.

**Table S2.1: “Pure Hydrology”**

| Author(s)              | Approx. Latitude | Approx. Longitude | Approx. Regional location                                  | Climate region | Notes                                                                                               |
|------------------------|------------------|-------------------|------------------------------------------------------------|----------------|-----------------------------------------------------------------------------------------------------|
| Archarya et al. (2)    | 25.7459          | -80.555           | Florida Everglades                                         | Am             |                                                                                                     |
| Ala-aho et al.         | 65.2             | 27                | Rokua Esker, Finland                                       | Dfc            |                                                                                                     |
| Ala-aho et al.         | 57               | -3.46             | Scotland                                                   | Cfc            |                                                                                                     |
| Autio et al.           |                  |                   | None                                                       |                |                                                                                                     |
| Baird et al.           |                  |                   | None                                                       |                |                                                                                                     |
| Ballard et al.         | 54.231667        | -2.2525           | UK                                                         | Cfb            |                                                                                                     |
| Belyea                 | 58.087           | -5.05             | Scotland                                                   | Cfb            | Another site for this study was farther south: (55.117, -4.4); same climate region                  |
| Binet et al.           | 47.317           | 2.267             | France                                                     | Cfb            |                                                                                                     |
| Bourgault et al.       | 45.97            | -73.33            | Quebec, Canada                                             | Dfb            |                                                                                                     |
| Brandyk et al.         | 52               | 21.3              | Poland                                                     | Cfb            |                                                                                                     |
| Brust et al.           | 53.263           | 8.2675            | Germany                                                    | Cfb            |                                                                                                     |
| Camporese et al. (2)   | 45.167           | 12.15             | Venice, Italy                                              | Cfa            |                                                                                                     |
| Condro et al.          | -2.8             | 110.9             | Indonesia                                                  | Af             |                                                                                                     |
| Couwenberg             |                  |                   | None                                                       |                |                                                                                                     |
| Couwenberg et al.      | -54.75           | -68.33            | South Argentina                                            | ET             |                                                                                                     |
| Dimitrov et al.        | 54               | -105.1            | Saskatchewan, Canada                                       | Dfc            |                                                                                                     |
| DIMITROV ET AL.        | 45.4             | -75.5             | Ottawa, Canada                                             | Dfb            |                                                                                                     |
| DURANEL ET AL.         | 46.01            | 1.42              | France                                                     | Cfb            |                                                                                                     |
| GAO ET AL. (3)         | 54.683           | -2.383            | UK                                                         | Cfc, Cfb, Cfb  | 2 more study sites included in Wales, around (52.51, -3.81)                                         |
| GONG ET AL.            | 65               | 27                | Finland (full country)                                     | Dfc            |                                                                                                     |
| GOUZARDI ET AL.        | 53.5             | -1.9              | UK                                                         | Cfb            |                                                                                                     |
| GUERTIN ET AL.         | 47.2             | -93.3             | Minnesota, USA                                             | Dfb            |                                                                                                     |
| HAAHTI ET AL. (2)      | 63.88            | 28.677            | Finland                                                    | Dfc            |                                                                                                     |
| HASSELQUIST ET AL.     | 64.21            | 19.84             | Sweden                                                     | Dfc            |                                                                                                     |
| HEFFERNAN ET AL.       | 25.7459          | -80.555           | Florida Everglades                                         | Am             |                                                                                                     |
| HOKANSON ET AL.        | 56               | -115              | Alberta, Canada                                            | Dfc            |                                                                                                     |
| HWANG ET AL.           | 55               | -113              | Alberta, Canada                                            | Dfc            |                                                                                                     |
| IKKALA ET AL.          | 64.6             | 28.1              | Finland                                                    | Dfc            |                                                                                                     |
| JAENICKE ET AL.        | -2.42            | 113.63            | Indonesia                                                  | Af             |                                                                                                     |
| JAROS ET AL.           | 65.07            | 27.15             | Finland                                                    | Dfc            |                                                                                                     |
| JUTRAS ET AL.          | 53.7             | -78.17            | Quebec, Canada                                             | Dfc            |                                                                                                     |
| KAPLAN ET AL.          | 25.7459          | -80.555           | Florida Everglades                                         | Am             | Studied the site conceptually but the model does not draw from actual measurements                  |
| KENNEDY AND PRICE      | 48.783           | -72.167           | Quebec, Canada                                             | Dfb            |                                                                                                     |
| KOIVUSALO ET AL.       | 64.85            | 27.7              | Finland                                                    | Dfc            |                                                                                                     |
| LEVISON ET AL.         | 45               | -74               | Quebec, Canada                                             | Dfb            |                                                                                                     |
| LEWIS ET AL.           | 51.967           | -9.9              | Ireland                                                    | Cfb            |                                                                                                     |
| LI ET AL.              | 33.5             | 102.5             | Central China                                              | Dwc            |                                                                                                     |
| LUSCOMBE ET AL.        | 51.13            | -3.79             | UK                                                         | Cfb            |                                                                                                     |
| MARTTILA ET AL.        | 67.5             | 26.5              | Finland                                                    | Dfc            |                                                                                                     |
| MORRIS ET AL.          |                  |                   | None                                                       |                |                                                                                                     |
| MUSTAMO ET AL.         | 64.489           | 26.395            | Finland                                                    | Dfc            |                                                                                                     |
| NIEMINEN ET AL.        | 60.45            | 24.95             | Finland                                                    | Dfb, Dfc       | Study also had a northern site with coordinates (64.72, 26). This is in a different climate region. |
| NIJP ET AL.            | 64.183           | 19.55             | Sweden                                                     | Dfc            |                                                                                                     |
| POVILAITIS AND QUERNER | 54.45            | 23.57             | Lithuania                                                  | Dfb            |                                                                                                     |
| PRICE ET AL.           | 53.93            | -111.2            | Alberta, Canada                                            | Dfc            |                                                                                                     |
| PULLENS ET AL.         | 46.02            | 11.03             | Italy                                                      | Dfb            |                                                                                                     |
| PUTRA ET AL.           | -2.42            | 113.63            | Indonesia                                                  | Af             |                                                                                                     |
| QUERNER ET AL.         | 52.972           | 6.582             | Netherlands, Poland, Lithuania (see note for other coords) | Cfb, Cfb, Dfb  | Note: Poland (53.38, 22.53); Lithuania (54.45, 23.57)                                               |
| QUERNER ET AL.         | 54.45            | 23.57             | Lithuania                                                  | Dfb            |                                                                                                     |
| QUILLET ET AL.         | 47.52            | -75.25            | Quebec, Canada                                             | Dfb            |                                                                                                     |
| REEVE ET AL.           | 60.333           | -150.83           | Alaska, USA                                                | Dsc            |                                                                                                     |
| REEVE ET AL.           | 44.9             | -68.75            | Maine, USA                                                 | Dfb            |                                                                                                     |

|                     |        |         |                 |     |                                                         |
|---------------------|--------|---------|-----------------|-----|---------------------------------------------------------|
| REEVE ET AL.        | 50.8   | -88.1   | Ontario, Canada | Dfc |                                                         |
| REEVE ET AL.        |        |         | None            |     |                                                         |
| REEVE ET AL.        | 48.35  | -94.57  | Minnesota, USA  | Dfb |                                                         |
| Schmalz et al.      | 54.35  | 9.431   | Germany         | Cfb |                                                         |
| Stenberg et al.     | 66.5   | 26.7    | Finland         | Dfc |                                                         |
| Sterte et al.       | 64.23  | 19.77   | Sweden          | Dfc |                                                         |
| Suryadi et al.      | -2.42  | 113.63  | Indonesia       | Af  |                                                         |
| Sutton and Price    | 53.93  | -111.2  | Alberta, Canada | Dfc |                                                         |
| Taufik et al. (2)   | -2.382 | 112.74  | Indonesia       | Af  | Six separate sites, all within the same climate region. |
| Thompson et al. (2) | 56.07  | 115.5   | Alberta, Canada | Dwc |                                                         |
| Tiemeyer et al.     | 54.05  | 12.75   | Germany         | Cfb |                                                         |
| Tilak et al.        |        |         | None            |     |                                                         |
| Urzainki et al.     | 0.9525 | 102.184 | Indonesia       | Af  |                                                         |
| Weiss et al.        | 61.783 | 24.3    | Finland         | Dfc |                                                         |
| Zi et al.           | 51.983 | -8.753  | Ireland         | Cfb |                                                         |

**Table S2.2: GHG Dynamics**

| Author(s)                      | Approx. Latitude | Approx. Longitude | Approx. Regional location                                             | Climate region                        | Notes                                                                                                                                                                                                                           |
|--------------------------------|------------------|-------------------|-----------------------------------------------------------------------|---------------------------------------|---------------------------------------------------------------------------------------------------------------------------------------------------------------------------------------------------------------------------------|
| Arroyo-Mora et al.             | 45.4             | -75.5             | Ontario, Canada                                                       | Dfb                                   |                                                                                                                                                                                                                                 |
| Berrittella and van Huissteden | 53.8             | 23.3              | Europe (full continent)                                               | Dfb                                   |                                                                                                                                                                                                                                 |
| Bona et al.                    | 56.13            | -106.35           | Canada (full country)                                                 | Dfc                                   |                                                                                                                                                                                                                                 |
| Bosio et al.                   |                  |                   |                                                                       |                                       | 15 locations all within the same climate region. The northernmost site is at (69.642,18.76) and the southernmost site is at (68.1, 19.9). Many sites along the Sweden-Finland border. The most inland site is at (68.48, 22.31) |
|                                | 68.3             | 20.4              | Fennoscandia (Norway, Sweden, and Finland)                            | Dfc                                   |                                                                                                                                                                                                                                 |
| Chamberlain et al.             | 38.05            | 121.765           | California, USA                                                       | Csa                                   |                                                                                                                                                                                                                                 |
| Chang et al.                   | 68.2             | 19.03             | Sweden                                                                | ET                                    |                                                                                                                                                                                                                                 |
| Chaudhary et al.               |                  |                   |                                                                       |                                       | This is a supplement to a <i>Biogeosciences Discussions</i> paper. The Sweden site is Stordalen (appearing quite often), and Canadian site is Mer Bleue (45.5, -75.5)                                                           |
|                                | 68.2             | 19.03             | Sweden and Canada                                                     | ET, Dfb                               |                                                                                                                                                                                                                                 |
| Deng et al.                    | 68.2             | 19.03             | Sweden                                                                | ET                                    |                                                                                                                                                                                                                                 |
| Deng et al.                    | 64.7             | -148.1            | Alaska, USA                                                           | Dfb                                   |                                                                                                                                                                                                                                 |
| Dinsmore & Billett             | 55.8             | -3.24             | Scotland                                                              | Cfb                                   |                                                                                                                                                                                                                                 |
| Evrendilek                     | 40.79            | 32.09             | Turkey                                                                | Cfb                                   |                                                                                                                                                                                                                                 |
| Farmer et al.                  |                  |                   | None                                                                  |                                       |                                                                                                                                                                                                                                 |
| Farmer et al.                  | -0.715           | 114.7             | SE Asia (region)                                                      | Af                                    |                                                                                                                                                                                                                                 |
| Grant et al.                   | 71.3             | -156.5            | Alaska, USA                                                           | ET                                    |                                                                                                                                                                                                                                 |
| Henman and Poulter             | 35.625           | -76.04            | North Carolina, USA                                                   | Cfa                                   |                                                                                                                                                                                                                                 |
| Lai                            | 45.4             | -75.5             | Ontario, Canada                                                       | Dfb                                   |                                                                                                                                                                                                                                 |
| LIPPMANN                       |                  |                   | None                                                                  |                                       |                                                                                                                                                                                                                                 |
| PARKKARI ET AL.                | 63.9             | 26.7              | Finland (full country)                                                | Dfc                                   |                                                                                                                                                                                                                                 |
| PETRESCU ET AL.                | 52.89            | 6.62              | The Netherlands                                                       | Cfb                                   |                                                                                                                                                                                                                                 |
| PETRESCU ET AL.                | 70               | 147               | Russia and Sweden                                                     | Dsc, ET                               | The Russian site is Kytalyk reserve in Siberia. Sweden site is Stordalen (68.2, 19.03)                                                                                                                                          |
| POTTER                         | 68.64            | -149.57           | Alaska, USA                                                           | Dfc                                   | Parameter measurements also taken near Fairbanks (64.8, -147.8)                                                                                                                                                                 |
| PREMROV ET AL.                 | 53.297           | -7.966            | Ireland                                                               | Cfb, Cfb                              | The second site is at (53.347, -8.515)                                                                                                                                                                                          |
| ROULET & WANG                  | 55.333           | -77.5             | Quebec, Canada                                                        | Dfc                                   |                                                                                                                                                                                                                                 |
| SHANIN ET AL.                  | 61               | 24.75             | Finland                                                               | Dfb, Dfc                              | Second site is at (62.45, 29.05)                                                                                                                                                                                                |
| SONNENTAG ET AL.               | 45.4             | -75.5             | Ontario, Canada                                                       | Dfb                                   |                                                                                                                                                                                                                                 |
| THIELE ET AL.                  | 52.1             | 27.13             | Belarus                                                               | Dfb                                   | Unable to find exact site coordinates, peatlands described generally occur in south Belarus.                                                                                                                                    |
| WALTER ET AL.                  | 42.46            | -84.01            | Michigan, USA                                                         | Dfa                                   | Inferred that the Michigan peatlands are the same site as in Wania et al., just because the authors overlap.                                                                                                                    |
| WANIA ET AL.                   |                  |                   |                                                                       |                                       | Additional sites: Minnesota (47.5,-93.47); Manitoba, Canada (55.75,-99); Finland (63.31); Degero Sweden (64,20); Abisko Sweden (68,19); Central China (33,103)                                                                  |
|                                | 42.46            | -84.01            | Michigan and Minnesota, USA; Canada, Finland, Sweden (2 sites), China | Dfa, Dfb, Dfc, Dfc, Dfc, Dfc, ET, Dwc |                                                                                                                                                                                                                                 |
| WORRALL & CLAY                 | 54.65            | -2.25             | UK                                                                    | Cfb                                   |                                                                                                                                                                                                                                 |
| WU ET AL.                      | 64.183           | 19.55             | Sweden                                                                | Dfc                                   |                                                                                                                                                                                                                                 |

**Table S2.3: Peat Accumulation**

| Author(s) | Approx. Latitude | Approx. Longitude | Approx. Regional location | Climate region | Notes |
|-----------|------------------|-------------------|---------------------------|----------------|-------|
| Bauer     | 54               | -113              | Alberta, Canada           | Dfb            |       |

|                   |         |         |                                     |     |                                                                                                  |
|-------------------|---------|---------|-------------------------------------|-----|--------------------------------------------------------------------------------------------------|
| Belyea & Malmer   | 57.25   | 13.917  | Sweden                              | Cfb |                                                                                                  |
| Chimner et al.    | 39.56   | -105.81 | Colorado, USA                       | ET  |                                                                                                  |
| Frolking et al.   | 45.4    | -75.5   | Ontario, Canada                     | Dfb |                                                                                                  |
| Larsen et al.     | 25.7459 | -80.555 | Florida Everglades                  | Am  |                                                                                                  |
| Quillet et al.    | 45.4    | -75.5   | Ontario, Canada                     | Dfb | Parameters were informed by Mer Bleue data for model initiation, but no new monitoring occurred. |
| Rennermalm et al. | 57.5    | 74.5    | West Siberia, Russia (whole region) | Dfb |                                                                                                  |
| Swindles et al.   | 54.1    | -2.17   | UK                                  | Cfb |                                                                                                  |
| Wang et al.       | 60.35   | -150.66 | Alaska, USA                         | Dsc |                                                                                                  |
| Wu                | 45.4    | -75.5   | Ontario, Canada                     | Dfb | Parameters were informed by Mer Bleue data for model initiation, but no new monitoring occurred. |

**Table S2.4: Global Models**

| Author(s)          | Approx. Latitude | Approx. Longitude        | Approx. Regional location                     | Climate region          | Notes                                                                                                                                                    |
|--------------------|------------------|--------------------------|-----------------------------------------------|-------------------------|----------------------------------------------------------------------------------------------------------------------------------------------------------|
| Bechtold et al.    | 45 to 65         | (internal link to excel) | Northern hemisphere                           |                         |                                                                                                                                                          |
| Bechtold et al.    | 45 to 70         | -170 to 95               | Northern hemisphere                           |                         | 13 locations for in-situ measurements are included in Appendix Table S1.                                                                                 |
| Bechtold et al.    | 51               | 10.3                     | Germany (throughout whole country)            | Cfb                     |                                                                                                                                                          |
| Burdun et al.      | see notes        | see notes                | Canada, USA, Estonia, Sweden, Finland         | Dfb, Dfb, Dfc, Dfc, Dfb | Estonia: (58.88, 26.2); Canada Mer Bleue: (45.41, -75.52); Degero Stormyr Sweden: (64.18, 19.55); Finland: (67.99, 24.2); Lost Creek UA: (46.08, -89.97) |
| Dietrich et al.    |                  |                          | None                                          |                         |                                                                                                                                                          |
| Gong et al.        | 65.81            | 26.91                    | Finland (whole country)                       | Dfc                     |                                                                                                                                                          |
| Graham et al.      | 47.5             | -93.45                   | Minnesota, USA (SPRUCE within Marcell Forest) | Dfb                     |                                                                                                                                                          |
| Hall et al.        | 69.817           | 27.2                     | Finland                                       | Dfc                     |                                                                                                                                                          |
| Humpenoeder et al. |                  |                          | None (world)                                  |                         |                                                                                                                                                          |
| Largeron et al.    | 64.18            | 19.55                    | Sweden, Finland                               | Dfc, Dfc, Cfb           | The other Swedish site is Fajemyr (56.25,13.55) and the Finnish site is Siikaneva (61.817, 24.183)                                                       |
| Nungesser et al.   | 25.7459          | -80.555                  | Florida Everglades                            | Am                      |                                                                                                                                                          |
| Petrescu et al.    |                  |                          | None (northern hemisphere)                    |                         |                                                                                                                                                          |
| Qiu et al.         |                  | (link to appendix)       | Northern hemisphere                           |                         | 30 NH sites taken from FLUXNET/AmeriFlux databases.                                                                                                      |
| Qiu et al.         |                  | (link to appendix)       | Northern hemisphere                           |                         | 60 NH sites taken from HPPB database.                                                                                                                    |
| Spahni et al.      |                  |                          | None (northern hemisphere)                    |                         |                                                                                                                                                          |

**Table S2.5: Model Combinations**

| Author(s)             | Approx. Latitude | Approx. Longitude | Approx. Regional location      | Climate region | Notes                                                                                                   |
|-----------------------|------------------|-------------------|--------------------------------|----------------|---------------------------------------------------------------------------------------------------------|
| Aleina et al.         | 61.93            | 50.217            | Russia                         | Dfc            |                                                                                                         |
| Bernard-jannin et al. | 47.317           | 2.267             | France                         | Cfb            |                                                                                                         |
| Bohn et al.           | 56.483           | 83.15             | Russia                         | Dfb            |                                                                                                         |
| Booth et al.          | 43.5             | -89.1             | Wisconsin, USA                 | Dfb            |                                                                                                         |
| De wit et al.         | 69.133           | 16.017            | Norway                         | Dfc            |                                                                                                         |
| Eppinga et al.        |                  |                   | None                           |                |                                                                                                         |
| Hahti et al.          | 63.883           | 28.667            | Finland                        | Dfc            |                                                                                                         |
| Ju et al.             |                  |                   | Saskatchewan & Ontario, Canada |                | Mer Bleue coordinates in sheet. BOREAS super site near Prince Albert National Park SASK: (53.9, -106.1) |
| Kurylyk et al.        | 45.4             | -75.5             | Northern Territories, Canada   | Dfb, Dfc       |                                                                                                         |
| Wilson et al.         | 61.313           | -121.31           | Ireland                        | Dfc            |                                                                                                         |
| Xu et al.             | 53.347           | -8.582            | Central UK                     | Cfb            |                                                                                                         |
|                       | 53.421           | -1.704            |                                |                | Multiple sites; same climate region                                                                     |

**Table S2.6: Coupled Models**

| Author(s)          | Approx. Latitude | Approx. Longitude | Approx. Regional location | Climate region | Notes                                                     |
|--------------------|------------------|-------------------|---------------------------|----------------|-----------------------------------------------------------|
| Brooks et al.      | 47.5             | -93.5             | Minnesota, USA            | Dfb            |                                                           |
| Dimitrov et al.    | 45.4             | -75.5             | Ontario, Canada           | Dfb            |                                                           |
| Gong et al.        | 62.5             | 30.5              | Finland                   | Dfc            |                                                           |
| Gong et al.        | 61.783           | 24.3              | Finland                   | Dfc            |                                                           |
| Gong et al.        | 62.5             | 30.5              | Finland                   | Dfc            |                                                           |
| He et al.          | 58.383           | 12.15             | Sweden                    | Cfb            |                                                           |
| Heinemeyer et al.  | 54.68            | -2.37             | UK                        | Cfc            |                                                           |
| Hilbert et al.     |                  |                   | None                      |                |                                                           |
| Ise et al.         | 55.9             | -98.35            | Manitoba, Canada (BOREAS) | Dfc            |                                                           |
| Kasimir et al.     | 58.383           | 12.15             | Sweden                    | Cfb            |                                                           |
| Lauren et al.      | 62               | 26                | Finland                   | Dfc            |                                                           |
| Mahdiyasa et al.   |                  |                   | None                      |                |                                                           |
| Melaku et al.      | 55               | -113              | Alberta, Canada           | Dfc            |                                                           |
| Metzger et al.     | 64.182           | 19.557            | Sweden                    | Dfc            |                                                           |
| Mezbahuddin et al. | 54.95            | 112.47            | Alberta, Canada           | Dwc            |                                                           |
| Mezbahuddin et al. | -2.345           | 114.036           | Kalimantan, Indonesia     | Af             |                                                           |
| MI ET AL.          | 70.817           | 147.483           | Siberia, Russia           | Dfc            | Weather station data came from an ET (polar tundra) zone. |
| MORRIS ET AL.      |                  |                   | None                      |                |                                                           |
| MORRIS ET AL.      | 60.044           | 17.327            | Sweden                    | Cfb            |                                                           |
| MORRIS ET AL.      | 54.098           | 2.173             | UK                        | Cfb            |                                                           |
| NAKAYAMA           | 43.16            | 144.47            | Japan                     | Dfb            |                                                           |
| NAKAYAMA           | 65.916           | 70.1              | Siberia, Russia           | Dfc            |                                                           |
| NUNGESSER          |                  |                   | Maine and Minnesota, USA; | Dfb, Dfc, Dfb, | Maine location listed. Sweden: (68.367, 19.05);           |
|                    | 44.833           | -68.75            | Ontario, Canada; Sweden   | Dfb            | Minnesota Marcell: (47.5, -93.5); Canada: (52.1, -        |

|                             |        |         |                             |               |                                                                                                                                       |
|-----------------------------|--------|---------|-----------------------------|---------------|---------------------------------------------------------------------------------------------------------------------------------------|
|                             |        |         |                             |               | 81.55)                                                                                                                                |
| <b>SHI ET AL.</b>           | 47.5   | -93.5   | Minnesota, USA              | Dfb           |                                                                                                                                       |
| <b>SULMAN ET AL.</b>        |        |         | Wisconsin, USA; Alberta and |               | Mer Bleue listed. Lost Creek WI: (46.082, -89.98);                                                                                    |
|                             | 45.4   | -75.5   | Ontario, Canada             | DFb, Dfb, Dfc | western peatland AL: (54.95, -112.47)                                                                                                 |
| <b>TANG ET AL.</b>          | 68.35  | 19.05   | Sweden                      | Dfc           |                                                                                                                                       |
| <b>TREPEL AND<br/>KLUGE</b> | 54.217 | 10.035  | Germany                     | Cfb           |                                                                                                                                       |
| <b>WEBSTER ET AL.</b>       | 48.35  | -83.35  | Ontario, Canada             | Dfb           |                                                                                                                                       |
| <b>WU ET AL.</b>            | 45.4   | -75.5   | Ontario, Canada             | Dfb, Dfc      | Also at Degero Stormyr, (64.183, 19.55)                                                                                               |
| <b>YOUNG ET AL.</b>         |        |         |                             |               | General model without a specific site, but the paper<br>attempts to model blanket bogs which are the most<br>extensive in central UK. |
|                             | 52.5   | -1.5    | UK                          | Cfb           |                                                                                                                                       |
| Yuan et al.                 | 47.5   | -93.5   | Minnesota, USA              | Dfb           |                                                                                                                                       |
| Zhang et al.                |        |         | Saskatchewan, Canada;       |               |                                                                                                                                       |
|                             | 53.95  | -105.95 | Minnesota, USA              | Dfb, Dfc      | The other site is Marcell: (47.5, -93.5)                                                                                              |
