# Supplementary material for: Reviews and Syntheses: Evaluating the Potential Application of Ecohydrological Models for Northern Peatland Restoration: A Scoping Review
Source: Copernicus journal article supplement (doi:10.5194/bg-2023-167), 2023-10-10
Supplement: Supplementary file 3 [file bg-2023-167-supplement.zip › supplementary_material/s5.pdf]

**Table S5: Full breakdown of relative time spans involved per site for “top three” model runs.**

|                       | <i>Paper</i>                                     | <i>Time span of data</i>                                                                                  | <i>Time span of simulation</i>                                                                               |
|-----------------------|--------------------------------------------------|-----------------------------------------------------------------------------------------------------------|--------------------------------------------------------------------------------------------------------------|
| <b>DigiBog</b>        | Baird, Morris & Belyea, 2012                     | n/a                                                                                                       | 116 days                                                                                                     |
|                       | Morris, Baird & Belyea, 2013                     | n/a                                                                                                       | 100 developmental steps (varying scales)                                                                     |
|                       | Swindles et al., 2012                            | n/a (proxies used)                                                                                        | 2300-1850 cal. BP                                                                                            |
|                       | Mahdiyasa et al., 2022                           | n/a                                                                                                       | 6000 BCE - 0 CE                                                                                              |
|                       | Morris, Baird & Belyea, 2012                     | n/a                                                                                                       | varying scales: 500-5000 years                                                                               |
|                       | Morris, Baird & Belyea, 2015                     | Climate data: 1981-2011; no field measurements                                                            | n/a                                                                                                          |
|                       | Young et al., 2017                               | Climate data: 2010-2013; no field measurements                                                            | 4000-yr spin-up, 300 years simulated                                                                         |
|                       | Morris et al., 2015                              | n/a                                                                                                       | 8000-0 yrs. BP                                                                                               |
|                       | Putra, Baird, Holden, 2022                       | Climate data: 2011-2015; no field measurements                                                            | 2011-2012, 2013-2014, 2015-2016                                                                              |
| <b>ecosys</b>         | Dimitrov, Bhatti, & Grant, 2014                  | Climate data: 1994-2008; field measurements: 2003-2005                                                    | 2003-2005                                                                                                    |
|                       | Dimitrov et al., 2010a                           | Climate data and field measurements (calibration): 1998-2004; validation: 2001 and 2004                   | spin-up: 60 to 70 years; total model run: 106 years; analysis: 2000-2004                                     |
|                       | Chang et al., 2019a                              | Climate data and field measurements (for both calibration and validation): 2002-2007                      | spin-up: 1901-2001; analysis: 2002-2010                                                                      |
|                       | Chang et al., 2019b                              | Climate data and field measurements (for both calibration and validation): 2011-2013                      | spin-up: 1901-2001; analysis: 2002-2013                                                                      |
|                       | Grant et al., 2017                               | Field measurements: 2013; climate data: 1981-2013 and 2013-2015                                           | spin-up: 1980-2013; analysis: 1985-2015                                                                      |
|                       | Dimitrov et al., 2010b                           | Climate data and field measurements (calibration): 1998-2004; validation: 2001 and 2004                   | spin-up: 60 to 70 years; total model run: 106 years; analysis: 2000-2004                                     |
|                       | Dimitrov et al., 2011                            | Climate data and field measurements (calibration): 1998-2004; validation: 2001 and 2004                   | spin-up: 60 to 70 years; total model run: 106 years; analysis: 2000-2004                                     |
|                       | Mezbahuddin, Grant, & Flanagan, 2016             | Climate data and field measurements (for both calibration and validation): 2003-2009                      | spin-up: 1961-2002; analysis: 2004-2009                                                                      |
|                       | Mezbahuddin, Grant, & Hirano, 2015               | Climate data and field measurements (for both calibration and validation): 2002-2005                      | spin up: 1961-2001; analysis: 2002-2005                                                                      |
|                       | Mezbahuddin, Grant, & Hirano, 2014               | Climate data and field measurements (for both calibration and validation): 2002-2005                      | spin up: 1961-2001; analysis: 2002-2005                                                                      |
|                       | Mezbahuddin, Grant, & Flanagan, 2017             | Climate data and field measurements (for both calibration and validation): 2003-2009                      | spin-up: 1961-2002; analysis: 2004-2009                                                                      |
|                       |                                                  |                                                                                                           |                                                                                                              |
| <b>ecosys and LPJ</b> | Sulman et al., 2012 (Lost Creek)                 | Field measurements: 2001-2006; climate data measured/gap-filled for the same period                       | spin-up: not specified--at least 5 years; analysis: not specified (possibly same as field measurement spans) |
|                       | Sulman et al., 2012 (Western Peatland)           | Field measurements: 2004-2007; climate data measured/gap-filled for the same period                       |                                                                                                              |
|                       | Sulman et al., 2012 (Mer Bleue)                  | Field measurements: 1999-2006; climate data measured/gap-filled for the same period                       |                                                                                                              |
| <b>LPJ</b>            | Chaudhary, Miller, & Smith, 2017 (Sweden)        | Climate data: 1901-2000; no field measurements                                                            | 5000 cal. BP - 2000; 1900-2100                                                                               |
|                       | Chaudhary, Miller, & Smith, 2017 (Canada)        | Climate data: 1901-2000; no field measurements                                                            | 10000 cal. BP - 2000; 1900-2100                                                                              |
|                       | Wania, Ross, & Prentice, 2010 (MI, USA)          | Climate data: 1901-2002; field measurements: 1991                                                         | Spin-up: 1000 years; analysis: 1991                                                                          |
|                       | Wania, Ross, & Prentice, 2010 (MN, USA)          | Climate data: 1901-2002; field measurements: 1989                                                         | Spin-up: 1000 years; analysis: 1989                                                                          |
|                       | Wania, Ross, & Prentice, 2010 (Canada)           | Climate data: 1901-2002; field measurements: 1996                                                         | Spin-up: 1000 years; analysis: 1996                                                                          |
|                       | Wania, Ross, & Prentice, 2010 (Finland)          | Climate data: 1901-2002; field measurements: 1993                                                         | Spin-up: 1000 years; analysis: 1993                                                                          |
|                       | Wania, Ross, & Prentice, 2010 (Northeast Sweden) | Climate data: 1901-2002; field measurements: 1996                                                         | Spin-up: 1000 years; analysis: 1996                                                                          |
|                       | Wania, Ross, & Prentice, 2010 (North Sweden)     | Climate data: 1901-2002; field measurements: 2006                                                         | Spin-up: 1000 years; analysis: 2006                                                                          |
|                       | Wania, Ross, & Prentice, 2010 (China)            | Climate data: 1901-2002; field measurements: 2001                                                         | Spin-up: 1000 years; analysis: 2001                                                                          |
|                       | Spahni et al., 2013                              | Climate data: Last Glacial Maximum (LGM)-2000AD and RCP scenarios 2000-2100                               | Spin-up: 1500 years; analysis: LGM-2100                                                                      |
|                       | Tang et al., 2015                                | Climate data: 1913-2000 and 2001-2012; field measurements: 2003-2012, 2007-2009, 2006-2008, and 2004-2008 | Spin-up: not specified; analysis: 2003-2012 (with various outputs matching field measurement spans)          |
|                       | Tang et al., 2018                                | Climate data: 1913-2000 and 2001-2012; field measurements: 2007-2009                                      | Spin-up: not specified; analysis: 2007-2009                                                                  |
|                       |                                                  |                                                                                                           |                                                                                                              |
